# Supplementary material
Source: PubMed Central journal article supplement (PMC2906317)
Supplement: supp_M109.084673_jbc.M109.084673-2.pdf [file supp_M109.084673_jbc.M109.084673-2.pdf]

## Supplemental Table 1

### Primers used for quantitative RT-PCR

| <i>Gene Name</i>   | <i>Species</i>  | <i>Sequence</i>                       |
|--------------------|-----------------|---------------------------------------|
| SM $\alpha$ -actin | Mouse/rat/human | F: 5'-ATGCTCCCAGGGCTGTTTTCCCAT-3'     |
|                    | Mouse/rat/human | R: 5'-GTGGTGCCAGATCTTTTCCATGTCG-3'    |
| versican           | Mouse/rat/human | F: 5'-CTGATAGCAGATTTGATGCCTACTGC-3'   |
|                    | Mouse/rat/human | R: 5'-GTGGTTCTTTGGATAAACTGGGTGATG-3'  |
| SPP1               | Mouse/rat/human | F: 5'-CTGACCCATCTCAGAAGCAGAATCT-3'    |
|                    | Mouse/rat       | R: 5'-TCCATGTGGTCATGGCTTTCATTGG-3'    |
| hprt               | Mouse           | F: 5'-TGGCCCTCTGTGTGCTCAA-3'          |
|                    | Mouse           | R: 5'-TGATCATTACAGTAGCTCTTCAGTCTGA-3' |
| myocardin          | Mouse/rat       | F: 5'-GTTTCAGCTACCCTGGGATGCACCAA -3'  |
|                    | Mouse/rat       | R: 5'-GGCCTGGTTTGAGAGAAGAAACACC -3'   |
| SM22 $\alpha$      | Mouse/rat/human | F: 5'-TGACATGTTCCAGACTGTTGACCTCT-3'   |
|                    | Mouse/rat/human | R: 5'-CTTCATAAACCAGTTGGGATCTCCAC-3'   |
| SRF                | Mouse/rat       | F: 5'-GATGGAGTTCATCGACAACAAGCTG-3'    |
|                    | Mouse/rat       | R: 5'-CCCTGTCAGCGTGGACAGCTCATA-3'     |
| RPLP0              | Rat             | F: 5'-GGA CCC GAG AAG ACC TCC TT-3'   |
|                    | Rat             | R: 5'-TGC TGC CGT TGT CAA ACA CC-3'   |
| miR-143            | Mouse/rat/human | F: 5'-TGAGATGAAGCACTGTAGCTC-3'        |
| miR-145            | Mouse/rat/human | F: 5'-GTCCAGTTTTCCCAGGAATCCCT-3'      |
| miR-133a           | Mouse/rat/human | F: 5'-TTTGGTCCCCTTCAACCAGCTG-3'       |
| miR-365            | Mouse/rat/human | F: 5'-TAATGCCCTAAAAATCCTTAT-3'        |
| pri-mir-143        | Mouse           | F: 5'-GGGTCTATCACAAGAAAGCTAACT-3'     |
|                    | Mouse           | R: 5'-TCTTGGGCAGGAGGAGTGTGAGCAT-3'    |
